# Supplementary material
Source: PubMed Central journal article supplement (PMC1560067)
Supplement: rspb20053368s03.pdf [file rspb20053368s03.pdf]

## **Appendix 1: Parental Care and Egg Size References**

Alford, R. 1999. Ecology: resource use, competition, and predation. In R. McDiarmid and R. Altig (eds.), *Tadpoles: The Biology of Anuran Larvae*, pp. 240-278. University of Chicago Press, Chicago.

Anstis, M. 2002. Tadpoles of South-eastern Australia. New Holland, Sydney.

Barker, J. & Grigg, G. 1977. A Field Guide to Australian Frogs. Rigby Limited, Adelaide.

Bartlett, R.D. & Bartlett, P.P. 1998. A Field Guide to Florida Reptiles & Amphibians. Houston, Limited.

Bartlett, R.D. & Barlett, P.P. 1999. A Field Guide to Texas Reptiles & Amphibians. Houston, TaylorWilson Publishing.

Bell, B.D. 1978. Observations on the ecology and reproduction of the New Zealand leiopelmid frogs. *Herpetologica* 34:340-354.

Blommers-Schlösser, R.M.A. 1975. Observations on the larval development of some Malagasy frogs, with notes on their ecology and biology (Anura: Discophinae, Scaphiophrynidae and Cophylinae). *Beaufortia* 24:7-26.

Blommers-Schlösser, R.M.A. 1979. Biosystematics of the Malagasy frogs, I. Mantellinae (Ranidae). *Beaufortia* 29:1-75.

Boulenger, G.A. & Sterling, K.B. 1978. The Tailless Batrachians of Europe. Manchester, Ayer Publishing.

Bourne, G.R., Collins, A.C., Holder, A.M. & McCarthy, C.L. 2001. Vocal communication and reproductive behavior of the frog *Colostethus bebee* in Guyana. *J. Herpetol.* 35:272-281.

- Brust, D. 1993. Maternal brood care by female *Dendrobates pumilio*, a frog that feeds its young. *Journal of Herpetology*, 27:96-98.
- Busse, K. 1970. Care of the young by male *Rhinoderma darwini*. *Copeia* 1970:395.
- Campbell, J.A. 1999. *Amphibians & Reptiles of Northern Guatemala, the Yucatan & Belize*  
Norman, University of Oklahoma Press.
- Case, T. & Fisher, R. 1997. *A Field Guide to Reptiles & Amphibians of Coastal Southern California*. La Jolla : Ted Case.
- Coe, M. 1974. Observations on the ecology and breeding biology of the genus *Chiromantis* (Amphibia: Rhacophoridae). *J. Zool. Lond.* 172:13-34.
- Cogger, H.G. 2000. *Reptiles & Amphibians of Australia*  
Sanibel, Ralph Curtis Publishing.
- Collins, J.T., Collins, S.L. & Hayes, J. 1993. *Amphibians & Reptiles in Kansas*.  
Lawrence, University Press of Kansas.
- Coloma, L. A. 1995. Ecuadorian frogs of the genus *Colostethus* (Anura: Dendrobatidae).  
*University of Kansas Museum of Natural History Occasional Papers*, 87: 1-72.
- Cook, C.L., Ferguson, J.W.H. & Telford. 2001. Adaptive male parental care in the giant bullfrog, *Pyxicephalus adspersus*. *J. Herpetol.*
- Corben, C.J., Ingram, G.J. & Tyler, M.J. 1974. Gastric brooding: a unique form of parental care in an Australian frog. *Science* 186:94 6-947.
- Corkran, CC & Thoms, C. 1996. *Amphibians of Oregon, Washington and British Columbia*. Lone Pine, Edmonton.

- Crump, M. 1974. Reproductive strategies in a tropical anuran community. *Miscellaneous Publications of the Museum of Natural History of the University of Kansas*, 61:1-68.
- Crump, M. 1992. Cannibalism in amphibians. In M. Elgar and B. Crespi (eds.), *Cannibalism: Ecology and Evolution Among Diverse Taxa*, pp. 256-276. Oxford University Press, Oxford.
- De la Riva, I. 1995. A new reproductive mode for the genus *Adenomera* (Amphibia: Anura: Leptodactylidae): taxonomic implications for certain Bolivian and Paraguayan populations. *Studies on Neotropical Fauna and Environment* 30:15-29.
- Degenhardt, W.G., Painter, C.W. & Price, A.H. 1996. *Amphibians & Reptiles of New Mexico*. Albuquerque, University of New Mexico Press.
- DeGraaf, R.M. & Rudis, D.D. 1983. *Amphibians & Reptiles of New England Habitats & Natural History*. Amherst : University of Massachusetts Press.
- Deuchar, E.M. *Xenopus: The South African Clawed Frog*. Ann Arbor, Books on Demand.
- Dixon, J.R. & Rivero-Blanco, C. 1985. A new dendrobatid frog (*Colostethus*) from Venezuela with notes on its natural history and that of related species. *J. Herpetol.* 19:177-184.
- Dixon, J.R. 2000. *Amphibians & Reptiles of Texas*. College Station, Texas A & M University Press,
- Downie, J.R. 1996. A new example of female parental behavior in *Leptodactylus validus*, a frog of the leptodactylid '*melanotus*' species group. *Herp. J.* 6:32-34.
- Duellman, W.E. 1978. The biology of an equatorial herpetofauna in Amazonian Ecuador. *Misc. Publ. Mus. Nat. Hist. Univ. Kansas* 65:1-352.

- Duellman, W.E. & Manness, S.J. 1980. The reproductive behavior of some hyloid marsupial frogs. *J. Herpetol.* 14:213-222.
- Duellman, W.E. & Gray, P. 1983. Developmental biology and systematics of the egg-brooding hyloid frogs, genera *Flectonotus* and *Fritziana*. *Herpetologica* 39:333-359.
- Duellman, W. E., and L. Trueb. 1986. *Biology of Amphibians*. McGraw-Hill, New York.
- Duellman, W.E. 1992. Reproductive strategies of frogs. *Sci. Amer.* 1992:80-87.
- Dundee, H.A., Rossman, D.E. & Beckham, E.C. 1996. *Amphibians & Reptiles of Louisiana*. Baton Rouge : Louisiana State University Press.
- Duellman, W.E. 2001. Hyloid frogs of Middle America, Vol. 1. *Contributions to Herpetology*, Vol. 18. Society for the Study of Amphibians and Reptiles, Ithaca, New York.
- Du Preez, L.H. 1996. Field guide and key to the frogs & toads of the Free State. Dept. of Zoology & Entomology, University of the Orange Free State.
- Ehmann, H. & Swan, G. 1985. Reproduction and development in the marsupial frog, *Assa darlingtoni* (Leptodactylidae, Anura). Pp. 279-285 In: *Biology of Australasian Frogs and Reptiles* (Grigg, G., Shine, R. & Ehmann, H. eds.). Royal Zool. Soc. Of New South Wales, Mosman.
- Ellis, M.M. & Henderson, J. 2000. *The Amphibia & Reptilia of Colorado*. Landisville : Arment Biological Press.
- Gibbons, J. W. & Semlitsch, R.D. 1991. *Guide to the Reptiles & Amphibians of the Savannah River Site*. Athens, University of Georgia Press.
- Gibson, R.C. & Buley, K.R. 2004. Maternal care and obligatory oophagy in *Leptodactylus fallax*: a new reproductive mode in frogs. *Copeia* 2004:128-135.

- Glaw, F. & Vences, M. 1994. A Field Guide to the Amphibians and Reptiles of Madagascar, 2<sup>nd</sup> Ed. Moos Druck, Germany.
- Glaw, F. & Vences, M. 1996. Neue ergebnisse zur *Boophis goudoti*-gruppe aus Madagaskar: bioakustik, fortpflanzungsstrategien und beschreibung von *Boophis rufioculis* sp. nov. Salamandra 32:225-242.
- Goicoechea, O., Garrdo, O. & Jorquera, B. 1986. Evidence for a trophic paternal-larval relationship in the frog *Rhinoderma darwinii*. J. Herpetol. 20:168-178.
- Grandison, A.G.C. 1978. The occurrence of *Nectophrynoides* (Anura: Bufonidae) in Ethiopia. A new concept of the genus with a description of a new species. Monit. Zool. Italiano Suppl. 11:119-172.
- Green, DM & Campbell, RW. 1984. The Amphibians of British Columbia. British Columbia Provincial Museum, Victoria.
- Harding, J.H. 1997. Amphibians & Reptiles of the Great Lakes Region. Ann Arbor, University of Michigan Press.
- Henderson, R.W. & Schwartz, A. 1984. A Guide to the Identification of the Amphibians & Reptiles of Hispaniola. Milwaukee, Milwaukee Public Museum.
- Henderson, Robert W. ; Schwartz, A., Garity, M.M., Leber, D. 1985. A Guide to the Amphibians & Reptiles of the West Indies, Exclusive of Hispaniola. Milwaukee, Milwaukee Public Museum.
- Henkel, F.-W., Schmidt, W. & Kaiser, H. 1998. Amphibians & Reptiles of Madagascar & the Mascarene, Seychelles, & the Comoro Islands. Melbourne, Krieger.
- Heselhaus, R. 1992. Poison-Arrow Frogs. Blandford, London.
- Hodge, R.P. 1976. Amphibians & Reptiles in Alaska, the Yukon & Northwest Territories

Seattle, Alaska Northwest Books.

Hunter, M.L., Calhoun, A.J. & McColloch, M. 1999. Maine Amphibians & Reptiles  
Orono, University of Maine Press.

Ibanez, R.D., Rand, A.S., & Jaramillo, C.A. 1999. The Amphibians of Barro Colorado  
National Monument, Soberania National Park, and Adjacent Areas. D'Vinni Editorial  
Limited, Bogota

Inger, R.F., Voris, H.K. & Walker, P. 1986. Larval transport in a Bornean ranid frog.  
*Copeia* 1986:523-525.

Inger, R.F. & Voris, H.K. 1988. Taxonomic status and reproductive biology of Bornean  
tadpole-carrying frogs. *Copeia* 1988:1060-1061.

Inger, R.F. ; Stuebing, R.B. 1997. A field guide to the frogs of Borneo. Kota Kinabalu,  
Natural History Publications.

Ingram, G.J., Anstis, M. & Corben, C.J. 1975. Observations on the Australian  
leptodactylid frog, *Assa darlingtoni*. *Herpetologica* 31:425-429.

Jacobson, S.K. 1985. Reproductive behavior and male mating success in two species of  
glass frogs (Centrolenidae). *Herpetologica* 41:396-404.

Jungfer, K.-H. 1996. Reproduction and parental care of the coronated treefrog, *Anothea*  
*spinosa* (Steindacher, 1864) (Anura: Hylidae). *Herpetologica* 52:25-32.

Jungfer, K-H & Schiesari, L.C. 1995. Description of a Central Amazonian and Guianan  
tree frog, genus *Osteocephalus* (Anura, Hylidae), with oophagous tadpoles  
*Alytes* 13:1-13.

Jungfer, K.-H. & Weygoldt, P. 1999. Biparental care in the tadpole feeding Amazonian  
treefrog, *Osteocephalus oophagus*. *Amphibia-Reptilia* 20:235-249.

- Kam, Y.C., Chuang, Z.S. & Yen, C.F. 1996. Reproduction, oviposition-site selection, and tadpole oophagy of an arboreal nester, *Chirixalus eiffingeri* (Rhacophoridae), from Taiwan. *J. Herpetol.* 30:52-59.
- Kaminsky, S.K., Linsenmair, E. & Ulmar Grafe, T. 1999. Reproductive timing, nest construction and tadpole guidance in the African pig-nosed frog, *Hemisus marmoratus*. *J. Herpetol.* 33:119-123.
- Kenney, J.S. 1969. The Amphibia of Trinidad. *Stud. Fauna Curacao & other Caribbean Islands*, Vol. XXIX, 1969. Martinus Nijhoff, The Hague.
- Klemens, MW. 1993. *Amphibians and Reptiles of Connecticut and Adjacent Regions*. State Geological and Natural History Survey of Connecticut, Hartford, CT.
- Kok, D, Du Preez, L.H. & Channing, A. 1989. Channel construction by the African bullfrog: another anuran parental care strategy. *J. Herpetol.* 23:435-437.
- Krugel, P. & Richter, S. 1995. *Syncope antenori* - A bromeliad breeding frog with free-swimming, nonfeeding tadpoles (Anura, microhylidae). *Copeia* 4:955-963.
- Kuramoto, M. 1978. Correlations of quantitative parameters of fecundity in amphibians. *Evolution* 32:287-296.
- Lang, C. 1995. Size-fecundity relationships among stream-breeding hylid frogs. *Herp. Nat. Hist.* 3:193-197.
- Lannoo, M.J., Townsend, D.S. & Wassersug, R.J. 1987. Larval life in the leaves: arboreal tadpole types, with special attention to the morphology, ecology and behavior of the oophagous *Osteopilus brunneus* (Hylidae) larva. *Fieldiana Zoology* 38:1-31.
- Lee, JC. 2000. *A Field Guide to the Amphibians and Reptiles of the Maya World*. Cornell University Press, Ithaca.

- Leonard, W.P., Brown, H.A., Jones, L.L. & McAllister, K.R. 1996. Amphibians of Washington & Oregon. Seattle, Seattle Audubon Society.
- Liu, C.C. 1950. Amphibians of Western China. 422 pp. Chicago Natural History Museum, Chicago.
- Livezey, R.L. & Wright, A.H. 1947. A syntopic key to the salientian eggs of the United States. *Amer. Midl. Nat.* 37:179-222.
- Lynch, J.D., Ruiz, P.M. & Rueda, J.V. 1983. Notes on the distribution and reproductive biology of *Centrolene geckoideum* Jimenez de la Espada in Colombia and Ecuador (Amphibia: Centrolenidae). *Studies on the Neotropical Fauna and Environment* 18:239-243.
- Malhotra, A. & Thorpe, R.S. 1999. Reptiles & Amphibians of the Eastern Caribbean. BPR Publishers.
- McDiarmid, R.W. & Gorzula, S. 1989. Aspects of the reproductive ecology and behavior of the Tepui toads, genus *Oreophrynella*. *Copeia* 1989:445-451.
- McPeak, R.H. 1999. Amphibians & Reptiles of Baja California Skyline Forest, Monterey.
- Minton, S. 1999. Amphibians & Reptiles of Indiana. Indianapolis, Indiana Academy of Science.
- Mitchell, N. & Swan, R. 1996. Terrestrial development in the Tasmanian frog, *Bryobatrachus nimbus* (Anura: Myobatrachidae): larval development and a field staging table. *Proc. Roy. Soc. Tasmania* 130:75-80.
- Moore, J.A. 1969. The frogs of Eastern New South Wales. *Bull. Am. Mus. Nat. Hist.* 121(3). 385 pp.



Morrison, P. 1994. Mammals, Reptiles, & Amphibians of Britain & Europe. London, Pan Books Limited.

Oldfield, B. Moriarty, J.J., Breckenridge, W. J. 1994. Amphibians & Reptiles Native to Minnesota. Minneapolis, University of Minnesota Press.

Ovencdon, A. & Burton, J.S. 1978. A Field Guide to Reptiles & Amphibians of Britain & Europe. London, Hammersmith.

Paris, M.G. 1985. Anfibios de Espana. Extension Agraria Corazon de Maria, Madrid.

Passmore, N.I. & Carruthers, V.C. 1995. South African Frogs: A Complete Guide. Witwatersrand University Press, Johannesburg.

Pickwell, G. 1987. Amphibians & Reptiles of the Pacific States  
Magnolia, Peter Smith Publisher, Incorporated.

Pienaar, U.V., Passmore, N.I., & Carruthers, V.C. 1976. The Frogs of the Kruger National Park. Sigma Press, Pretoria.

Prado, C.P. de A., Uetanabaro, M., & Lopes, F.S. 2000. Reproductive strategies of *Leptodactylus chaquensis* and *L. podicipinus* in the Pantanal, Brazil. J. Herpetol. 34:135-139.

Prado, C.P. de A., Uetanabaro, M. & Haddad, C.F.B. 2002. Description of a new reproductive mode in *Leptodactylus* (Anura: Leptodactylidae), with a review of the reproductive specialization toward terrestriality in the genus. Copeia 2002:1128-1133.

Pyburn, W.F. 1975. A new species of microhylid frog of the genus *Synapturanus* from southeastern Colombia. Herpetologica 31:439-443.

Richter, J.D. 1999. A Comparative Methods of Approach to the Study of Oocytes & Embryos. New York, Oxford University Press.

- Roberts, J.D. 1984. Terrestrial egg deposition and direct development in *Arenophryne rotunda* Tyler, a myobatrachid frog from coastal sand dunes at Shark Bay, W.A. Aust. Wildl. Res. 11:191-200.
- Rodel, M.O. 1998. A reproductive mode so far unknown in African ranids: *Phrynobatrachus guineensis* Guibe and Lamotte, 1961 breeds in treeholes. Herpetozoa 11:19-26.
- Rodel, M.-O. 2000. Herpetofauna of West Africa, Vol. I. Chimaira, Frankfurt.
- Rodel, M.-O., Kosuch, J., Veith, M., & Ernst, R. 2003. First record of the genus *Acanthixalus* Laurent, 1944 from the upper guinean rain forest, West Africa, with a description of a new species. J. Herpetol. 37: 43-52.
- Rodriguez, L.O. & Duellman, W.E. 1994. Guide to the Frogs of the Iquitos Region, Amazonian Peru. Natural History Museum, University of Kansas, Lawrence, KS.
- Salthe, S., and W. Duellman. 1973. Quantitative constraints associated with reproductive mode in anurans. In J. Vial (ed.), *Evolutionary Biology of the Anurans: Contemporary Research on Major Problems*, pp. 229-249. University of Missouri Press, Columbia.
- Savage, J. 2002. *The Amphibians and Reptiles of Costa Rica*. University of Chicago Press, Chicago.
- Scheel, J.J. 1970. Notes on the biology of the African tree-toad, *Nectophryne afra* Buchholz and Peters, 1875 (Bufonidae, Anura) from Fernando Poo. Rev. Zool. Bot. Afr. 81:225-236.
- Schleich, H.H., Kastle, W. & Kabisch, K. 1995. Amphibians & Reptiles of North Africa. Koeltz Scientific Books.

- Sheridan, D. 1997. Key-Guide to the Reptiles & Amphibians of the Central California Coast. Los Osos : Aryan I. Roest.
- Schiotz, A. 1999. Treefrogs of Africa. Frankfurt am Main, Meckenheim, Germany.
- Schwartz, A. & Henderson, R.W. 1991. Amphibians and Reptiles of the West Indies. University of Florida Press, Gainesville, Florida.
- Stebbins, RC. 1954. Amphibians and Reptiles of Western North America. McGraw-Hill, New York.
- Stephenson, E.M. & Stephenson, N.G. 1957. Field observations on the New Zealand frog, *Leiopelma* Fitzinger. Trans. Roy. Soc. New Zealand 84:867-882.
- Stewart, MM. 1967. Amphibians of Malawi. State University of New York Press, Albany.
- Taylor, J. & Rorer, A. 1993. The Amphibians & Reptiles of New Hampshire. Concord, New Hampshire Fish & Game Department.
- Thompson, R.L. 1996. Larval habitat, ecology and parental investment of *Osteopilus brunneus* (Hylidae). In: Contributions to West Indian herpetology: a tribute to Albert Schwartz. (Powell, R. & Henderson, R.W., eds.). Contributions to Herpetology Vol. 12. Society for the Study of Amphibians and Reptiles, Ithaca, New York.
- Tyler, M.J. 1994. Australian Frogs: A Natural History. Cornell University Press, Ithaca.
- van Dijk, D.E. 1997. Parental care in *Hemisus* (Anura: Hemisotidae). S. Afr. J. Zool. 32:56-57.
- Vaz-Ferreira, R. & Gehrau, A. 1974. Proteccion de la prole en leptodactylidos. Rev. Biol. Uruguay 2:59-62.

- Vences, M., Glaw, F. & Zapp, C. 1999. Bemerkungen zu eizahlen und eigroben bei madagassischen froschen der gattugen *Tomopterna*, *Aglyptodactylus*, *Boophis* und *Mantidactylus* (Amphibia: Ranidae). *Salamandra* 35:77-82.
- Vogt, R.C., Hine, R. & Nickerson, M. 1981. Natural History of Amphibians & Reptiles of Wisconsin. Milwaukee, Milwaukee Public Museum.
- Wager, V.A. 1986. Frogs of South Africa. Delta Books Ltd., Craighall.
- Wells, K. D. 1980. Behavioral ecology and social organization of a Dendrobatid frog (*Colostethus inguinalis*). *Behavioral Ecology and Sociobiology*, 6:199-209.
- Weygoldt, P. 1980. Complex brood care and reproductive behaviour in captive poison-arrow frogs, *Dendrobates pumilio* O. Schmidt. *Behavioral Ecology and Sociobiology*, 7:329- 332.
- Weygoldt, P. 1987. Evolution of parental care in dart poison frogs (Amphibia: Dendrobatidae). *Zeitschrift Zoologische Systematik:Evolution-forsch.van der Meijden*,

| Genus                  | Species                 | EggSize | PC |
|------------------------|-------------------------|---------|----|
| <i>Acanthixalus</i>    | <i>sonjae</i>           | 3.22    | 1  |
| <i>Acris</i>           | <i>crepitans</i>        | 1.5333  | 0  |
| <i>Acris</i>           | <i>gryllus</i>          | 1.05    | 0  |
| <i>Adelotus</i>        | <i>brevis</i>           | 1.975   | 1  |
| <i>Adenomera</i>       | <i>andreae</i>          | 3       | 0  |
| <i>Adenomera</i>       | <i>hylaedactyla</i>     | 3       | 0  |
| <i>Afrixalus</i>       | <i>brachycnemis</i>     | 1.2     | 0  |
| <i>Afrixalus</i>       | <i>fornasinii</i>       | 1.6     | 0  |
| <i>Agalychnis</i>      | <i>annae</i>            | 3.3     | 0  |
| <i>Agalychnis</i>      | <i>calcalifer</i>       | 4       | 0  |
| <i>Aglyptodactylus</i> | <i>laticeps</i>         | 1       | 0  |
| <i>Aglyptodactylus</i> | <i>madagascariensi</i>  | 1.35    | 0  |
| <i>Allobates</i>       | <i>femoralis</i>        | 1.9     | 1  |
| <i>Alytes</i>          | <i>cisternasii</i>      | 3.25    | 1  |
| <i>Alytes</i>          | <i>muletensis</i>       | 4.5     | 1  |
| <i>Alytes</i>          | <i>obstetricans</i>     | 3.55    | 1  |
| <i>Amalops</i>         | <i>jerboa</i>           | 1.3     | 0  |
| <i>Anhydrophryne</i>   | <i>rattrayi</i>         | 2.6     | 1  |
| <i>Anotheca</i>        | <i>spinosa</i>          | 1.62    | 1  |
| <i>Arenophryne</i>     | <i>rotunda</i>          | 5.5     | 0  |
| <i>Arthroleptella</i>  | <i>hewitti</i>          | 3       | 0  |
| <i>Arthroleptella</i>  | <i>lightfooti</i>       | 4.25    | 0  |
| <i>Arthroleptis</i>    | <i>stenodactylus</i>    | 2       | 1  |
| <i>Arthroleptis</i>    | <i>wahlbergii</i>       | 2.5     | 1  |
| <i>Ascaphus</i>        | <i>truei</i>            | 4.3333  | 0  |
| <i>Assa</i>            | <i>darlingtoni</i>      | 2.45    | 1  |
| <i>Atelopus</i>        | <i>carbonerensis</i>    | 1.5     | 0  |
| <i>Atelopus</i>        | <i>spmarius</i>         | 2       | 0  |
| <i>Bombina</i>         | <i>bombina</i>          | 2       | 0  |
| <i>Bombina</i>         | <i>maxima</i>           | 3.8     | 0  |
| <i>Boophis</i>         | <i>albilabris</i>       | 2.5     | 0  |
| <i>Boophis</i>         | <i>erythrodactylus</i>  | 2       | 0  |
| <i>Boophis</i>         | <i>luteus</i>           | 2.25    | 0  |
| <i>Boophis</i>         | <i>madagascariensis</i> | 3       | 0  |
| <i>Brachycephalus</i>  | <i>ephippum</i>         | 5.2     | 0  |
| <i>Breviseps</i>       | <i>adsperus</i>         | 4.5     | 1  |
| <i>Breviseps</i>       | <i>fuscus</i>           | 5       | 1  |
| <i>Bryobatrachus</i>   | <i>nimbus</i>           | 3.5     | 1  |
| <i>Bufo</i>            | <i>alvarius</i>         | 1.4     | 0  |
| <i>Bufo</i>            | <i>americanus</i>       | 1.2     | 0  |
| <i>Bufo</i>            | <i>angusticeps</i>      | 1.75    | 0  |
| <i>Bufo</i>            | <i>asper</i>            | 1.1     | 0  |
| <i>Bufo</i>            | <i>boreas</i>           | 1.65    | 0  |
| <i>Bufo</i>            | <i>bufo</i>             | 2       | 0  |
| <i>Bufo</i>            | <i>calamita</i>         | 1.5     | 0  |
| <i>Bufo</i>            | <i>canorus</i>          | 2.1     | 0  |
| <i>Bufo</i>            | <i>cognatus</i>         | 1.1833  | 0  |
| <i>Bufo</i>            | <i>coniferus</i>        | 1.8     | 0  |
| <i>Bufo</i>            | <i>debilis</i>          | 1       | 0  |
| <i>Bufo</i>            | <i>dombensis</i>        | 1.7     | 0  |
| <i>Bufo</i>            | <i>fastidiosus</i>      | 4.3     | 0  |
| <i>Bufo</i>            | <i>fenouheti</i>        | 1.8     | 0  |
| <i>Bufo</i>            | <i>garmani</i>          | 1.2     | 0  |
| <i>Bufo</i>            | <i>granulosus</i>       | 1       | 0  |
| <i>Bufo</i>            | <i>gutteralis</i>       | 1.45    | 0  |
| <i>Bufo</i>            | <i>maculatus</i>        | 1.3     | 0  |
| <i>Bufo</i>            | <i>marinus</i>          | 1.55    | 0  |
| <i>Bufo</i>            | <i>mauritanicus</i>     | 1.5     | 0  |

|                        |                          |        |   |
|------------------------|--------------------------|--------|---|
| <i>Bufo</i>            | <i>microscaphus</i>      | 1.55   | 0 |
| <i>Bufo</i>            | <i>quercicus</i>         | 0.995  | 0 |
| <i>Bufo</i>            | <i>rangeri</i>           | 1.3    | 0 |
| <i>Bufo</i>            | <i>regularis</i>         | 1.15   | 0 |
| <i>Bufo</i>            | <i>taitanus</i>          | 2.5    | 0 |
| <i>Bufo</i>            | <i>terrestris</i>        | 1.2    | 0 |
| <i>Bufo</i>            | <i>valliceps</i>         | 1.215  | 0 |
| <i>Bufo</i>            | <i>vertebralis</i>       | 1.8    | 0 |
| <i>Bufo</i>            | <i>viridis</i>           | 1.25   | 0 |
| <i>Bufo</i>            | <i>woodhousei</i>        | 1.25   | 0 |
| <i>Cacosternum</i>     | <i>boettgeri</i>         | 0.75   | 0 |
| <i>Cacosternum</i>     | <i>capense</i>           | 1      | 0 |
| <i>Callulops</i>       | <i>robusta</i>           | 6.75   | 1 |
| <i>Capensibufo</i>     | <i>rosei</i>             | 2.6    | 0 |
| <i>Capensibufo</i>     | <i>tradouwi</i>          | 2      | 0 |
| <i>Centrolene</i>      | <i>geckoideum</i>        | 3.75   | 1 |
| <i>Ceratophrys</i>     | <i>cornuta</i>           | 2      | 0 |
| <i>Chiasmocleis</i>    | <i>bassleri</i>          | 1      | 0 |
| <i>Chiasmocleis</i>    | <i>ventrimaculata</i>    | 1.25   | 0 |
| <i>Chiraxalus</i>      | <i>eiffingeri</i>        | 2.5    | 1 |
| <i>Chiraxalus</i>      | <i>idiootocus</i>        | 1.95   | 0 |
| <i>Chiromantis</i>     | <i>rufescens</i>         | 2.8    | 0 |
| <i>Chiromantis</i>     | <i>xerampelina</i>       | 1.9    | 1 |
| <i>Cochranella</i>     | <i>granulosa</i>         | 1.5    | 0 |
| <i>Cochranella</i>     | <i>munozorum</i>         | 1.5    | 0 |
| <i>Colostethus</i>     | <i>beebei</i>            | 2      | 1 |
| <i>Colostethus</i>     | <i>bromelicola</i>       | 1.7    | 1 |
| <i>Colostethus</i>     | <i>marchesianus</i>      | 1.75   | 1 |
| <i>Colostethus</i>     | <i>sauli</i>             | 1.5    | 1 |
| <i>Colostethus</i>     | <i>stephensi</i>         | 2      | 1 |
| <i>Colostethus</i>     | <i>trinitatis</i>        | 3.5    | 1 |
| <i>Colostethus</i>     | <i>vertebralis</i>       | 3      | 1 |
| <i>Cophixalus</i>      | <i>neglectus</i>         | 4.3    | 1 |
| <i>Cophixalus</i>      | <i>parkeri</i>           | 3.5    | 1 |
| <i>Crinia</i>          | <i>georgiana</i>         | 2.25   | 0 |
| <i>Crinia</i>          | <i>glauteri</i>          | 1.15   | 0 |
| <i>Crinia</i>          | <i>insignifera</i>       | 1.3    | 0 |
| <i>Crinia</i>          | <i>parainsignifera</i>   | 1.15   | 0 |
| <i>Crinia</i>          | <i>psuedoinsignifera</i> | 1.45   | 0 |
| <i>Crinia</i>          | <i>signifera</i>         | 1.475  | 0 |
| <i>Crinia</i>          | <i>tasmaniensis</i>      | 2.2025 | 0 |
| <i>Crinia</i>          | <i>tinnula</i>           | 1.15   | 0 |
| <i>Cryptobatrachus</i> | <i>boulengeri</i>        | 4      | 1 |
| <i>Cryptobatrachus</i> | <i>fuhrmanni</i>         | 4      | 1 |
| <i>Cyclorana</i>       | <i>alboguttata</i>       | 1.3    | 0 |
| <i>Cyclorana</i>       | <i>brevipes</i>          | 1.3    | 0 |
| <i>Cyclorana</i>       | <i>longipes</i>          | 1.35   | 0 |
| <i>Cyclorana</i>       | <i>novaeollandiae</i>    | 1.5    | 0 |
| <i>Dendrobates</i>     | <i>auratus</i>           | 2      | 1 |
| <i>Dendrobates</i>     | <i>histrionicus</i>      | 1.5    | 1 |
| <i>Dendrobates</i>     | <i>lehmanni</i>          | 1.5    | 1 |
| <i>Dendrobates</i>     | <i>leucomelas</i>        | 3.93   | 1 |
| <i>Dendrobates</i>     | <i>pumilio</i>           | 1.1    | 1 |
| <i>Dendrobates</i>     | <i>reticulatus</i>       | 2      | 1 |
| <i>Dendrobates</i>     | <i>ventrimaculatus</i>   | 2      | 1 |
| <i>Discoglossus</i>    | <i>pictus</i>            | 1.625  | 0 |
| <i>Duellmanohyla</i>   | <i>rufiocullis</i>       | 2.36   | 0 |
| <i>Duellmanohyla</i>   | <i>uranochoa</i>         | 2.59   | 0 |
| <i>Elastocleis</i>     | <i>bicolor</i>           | 1      | 0 |

|                          |                       |        |   |
|--------------------------|-----------------------|--------|---|
| <i>Eleutherodactylus</i> | <i>angelicus</i>      | 6.8    | 1 |
| <i>Eleutherodactylus</i> | <i>cundalli</i>       | 4.2    | 1 |
| <i>Eleutherodactylus</i> | <i>jasperi</i>        | 3.3    | 1 |
| <i>Eleutherodactylus</i> | <i>johnstonei</i>     | 2.965  | 1 |
| <i>Eleutherodactylus</i> | <i>latrans</i>        | 6.75   | 1 |
| <i>Epipedobates</i>      | <i>parvulus</i>       | 3      | 1 |
| <i>Epipedobates</i>      | <i>pictus</i>         | 2      | 1 |
| <i>Epipedobates</i>      | <i>silverstonei</i>   | 2      | 1 |
| <i>Epipedobates</i>      | <i>trivittatus</i>    | 3      | 1 |
| <i>Fejervarya</i>        | <i>limnocharis</i>    | 1.13   | 0 |
| <i>Flectonotus</i>       | <i>fissilis</i>       | 3      | 1 |
| <i>Flectonotus</i>       | <i>fitzgeraldi</i>    | 3      | 1 |
| <i>Flectonotus</i>       | <i>pygmaeus</i>       | 3      | 1 |
| <i>Fritziana</i>         | <i>goeldi</i>         | 4      | 1 |
| <i>Gastrophryne</i>      | <i>carolinesis</i>    | 1.1    | 0 |
| <i>Gastrophryne</i>      | <i>olivacea</i>       | 1.075  | 0 |
| <i>Gastrotheca</i>       | <i>argenteovirens</i> | 3      | 1 |
| <i>Gastrotheca</i>       | <i>cornuta</i>        | 9.8    | 1 |
| <i>Gastrotheca</i>       | <i>fissipes</i>       | 10     | 1 |
| <i>Gastrotheca</i>       | <i>galeata</i>        | 5      | 1 |
| <i>Gastrotheca</i>       | <i>marsupiata</i>     | 2      | 1 |
| <i>Gastrotheca</i>       | <i>microdisca</i>     | 8      | 1 |
| <i>Gastrotheca</i>       | <i>monticola</i>      | 3      | 1 |
| <i>Gastrotheca</i>       | <i>ovifera</i>        | 8      | 1 |
| <i>Gastrotheca</i>       | <i>plumbea</i>        | 4      | 1 |
| <i>Gastrotheca</i>       | <i>riobambae</i>      | 3      | 1 |
| <i>Geocrinia</i>         | <i>laevis</i>         | 2.475  | 0 |
| <i>Geocrinia</i>         | <i>leai</i>           | 1.85   | 0 |
| <i>Geocrinia</i>         | <i>rosea</i>          | 2.35   | 0 |
| <i>Geocrinia</i>         | <i>victoriana</i>     | 3.1    | 0 |
| <i>Hamptophryne</i>      | <i>boliviana</i>      | 1      | 0 |
| <i>Heleophryne</i>       | <i>purcelli</i>       | 3.8    | 0 |
| <i>Heleophryne</i>       | <i>regis</i>          | 3.6    | 0 |
| <i>Hemiphractus</i>      | <i>fasciatus</i>      | 7      | 1 |
| <i>Hemiphractus</i>      | <i>panamensis</i>     | 6      | 1 |
| <i>Hemiphractus</i>      | <i>probocideus</i>    | 2.5    | 1 |
| <i>Hemiphractus</i>      | <i>scutatus</i>       | 10     | 1 |
| <i>Hemisis</i>           | <i>guttatus</i>       | 2.5    | 1 |
| <i>Hemisis</i>           | <i>marmorata</i>      | 3.4167 | 1 |
| <i>Heterixalus</i>       | <i>alboguttaus</i>    | 1.5    | 0 |
| <i>Heterixalus</i>       | <i>betsileo</i>       | 1.6    | 0 |
| <i>Hoplobatrachus</i>    | <i>occipitalis</i>    | 5      | 0 |
| <i>Hoplophryne</i>       | <i>sp.</i>            | 4.75   | 0 |
| <i>Hyla</i>              | <i>alboguttata</i>    | 1.5    | 0 |
| <i>Hyla</i>              | <i>andersoni</i>      | 1.3    | 0 |
| <i>Hyla</i>              | <i>arborea</i>        | 1.5    | 0 |
| <i>Hyla</i>              | <i>arborescandens</i> | 2.15   | 0 |
| <i>Hyla</i>              | <i>arenicolor</i>     | 2.085  | 0 |
| <i>Hyla</i>              | <i>avivoca</i>        | 1.17   | 0 |
| <i>Hyla</i>              | <i>bifurca</i>        | 1.5    | 0 |
| <i>Hyla</i>              | <i>boans</i>          | 2      | 1 |
| <i>Hyla</i>              | <i>calcarata</i>      | 1.5    | 0 |
| <i>Hyla</i>              | <i>calypsa</i>        | 3.6    | 0 |
| <i>Hyla</i>              | <i>chrysofelis</i>    | 1.15   | 0 |
| <i>Hyla</i>              | <i>cinerea</i>        | 1.2    | 0 |
| <i>Hyla</i>              | <i>ebraccata</i>      | 1.3    | 0 |
| <i>Hyla</i>              | <i>femoralis</i>      | 1      | 0 |
| <i>Hyla</i>              | <i>geographica</i>    | 1      | 0 |
| <i>Hyla</i>              | <i>gratiosa</i>       | 1.45   | 0 |

|                         |                       |       |   |
|-------------------------|-----------------------|-------|---|
| <i>Hyla</i>             | <i>juanitae</i>       | 2.19  | 0 |
| <i>Hyla</i>             | <i>lancasteri</i>     | 4.3   | 0 |
| <i>Hyla</i>             | <i>lanciformis</i>    | 2     | 0 |
| <i>Hyla</i>             | <i>leucophyllata</i>  | 1.5   | 0 |
| <i>Hyla</i>             | <i>marmorata</i>      | 1.5   | 0 |
| <i>Hyla</i>             | <i>meridionalis</i>   | 1.3   | 0 |
| <i>Hyla</i>             | <i>minuta</i>         | 1     | 0 |
| <i>Hyla</i>             | <i>multifasciata</i>  | 1     | 0 |
| <i>Hyla</i>             | <i>parviceps</i>      | 1     | 0 |
| <i>Hyla</i>             | <i>phyllognatha</i>   | 3.08  | 0 |
| <i>Hyla</i>             | <i>pictipes</i>       | 2.44  | 0 |
| <i>Hyla</i>             | <i>platydactyla</i>   | 2.5   | 1 |
| <i>Hyla</i>             | <i>pseudopuma</i>     | 1.7   | 0 |
| <i>Hyla</i>             | <i>raniceps</i>       | 1     | 0 |
| <i>Hyla</i>             | <i>regilla</i>        | 1.3   | 0 |
| <i>Hyla</i>             | <i>rivularis</i>      | 2.36  | 0 |
| <i>Hyla</i>             | <i>rosenbergi</i>     | 1.95  | 1 |
| <i>Hyla</i>             | <i>sarayacuensis</i>  | 2     | 0 |
| <i>Hyla</i>             | <i>squirella</i>      | 0.9   | 0 |
| <i>Hyla</i>             | <i>sumichrasti</i>    | 1.61  | 0 |
| <i>Hyla</i>             | <i>taeniopus</i>      | 2.19  | 0 |
| <i>Hyla</i>             | <i>tica</i>           | 2.32  | 0 |
| <i>Hyla</i>             | <i>triangulum</i>     | 1.5   | 0 |
| <i>Hyla</i>             | <i>versicolor</i>     | 1.35  | 0 |
| <i>Hylinobatrachium</i> | <i>colymbiphyllum</i> | 1.5   | 1 |
| <i>Hylinobatrachium</i> | <i>fleischmanni</i>   | 2     | 1 |
| <i>Hylinobatrachium</i> | <i>valeroi</i>        | 2     | 1 |
| <i>Hymenochirus</i>     | <i>boettgeri</i>      | 0.75  | 0 |
| <i>Hyperolius</i>       | <i>argus</i>          | 1     | 0 |
| <i>Hyperolius</i>       | <i>nasutus</i>        | 0.975 | 0 |
| <i>Hyperolius</i>       | <i>semidiscus</i>     | 1     | 0 |
| <i>Hyperolius</i>       | <i>tuberlinguis</i>   | 1.5   | 0 |
| <i>Hypopachus</i>       | <i>cuneus</i>         | 1     | 0 |
| <i>Hypopachus</i>       | <i>variolosus</i>     | 1     | 0 |
| <i>Kaloula</i>          | <i>macropicta</i>     | 1.5   | 0 |
| <i>Kaloula</i>          | <i>rugifera</i>       | 1.5   | 0 |
| <i>Kassina</i>          | <i>maculata</i>       | 1.5   | 0 |
| <i>Kassina</i>          | <i>senegalensis</i>   | 1.7   | 0 |
| <i>Kyarranus</i>        | <i>sphagnicolus</i>   | 3.35  | 1 |
| <i>Lechriodus</i>       | <i>fletcheri</i>      | 1.7   | 0 |
| <i>Leiopelma</i>        | <i>archeyi</i>        | 4.5   | 1 |
| <i>Leiopelma</i>        | <i>hochstetteri</i>   | 5.5   | 1 |
| <i>Lepidobatrachus</i>  | <i>laevis</i>         | 2.5   | 0 |
| <i>Leptodactylus</i>    | <i>chaquensis</i>     | 1.5   | 1 |
| <i>Leptodactylus</i>    | <i>fallax</i>         | 1.6   | 1 |
| <i>Leptodactylus</i>    | <i>fuscus</i>         | 2     | 1 |
| <i>Leptodactylus</i>    | <i>labialis</i>       | 1.775 | 0 |
| <i>Leptodactylus</i>    | <i>melanotus</i>      | 1.25  | 0 |
| <i>Leptodactylus</i>    | <i>mystaceus</i>      | 2.4   | 0 |
| <i>Leptodactylus</i>    | <i>pentadactylus</i>  | 2.7   | 0 |
| <i>Leptodactylus</i>    | <i>podicipinus</i>    | 1.1   | 1 |
| <i>Leptodactylus</i>    | <i>rhodomystax</i>    | 3     | 0 |
| <i>Leptopelis</i>       | <i>natalensis</i>     | 3     | 1 |
| <i>Limnodynastes</i>    | <i>dumerilli</i>      | 1.7   | 0 |
| <i>Limnodynastes</i>    | <i>interioris</i>     | 1.7   | 0 |
| <i>Limnodynastes</i>    | <i>ornatus</i>        | 1.11  | 0 |
| <i>Limnodynastes</i>    | <i>peronii</i>        | 1.5   | 0 |
| <i>Limnodynastes</i>    | <i>spenceri</i>       | 1.5   | 0 |
| <i>Limnodynastes</i>    | <i>tasmaniensis</i>   | 1.14  | 0 |



|                        |                        |      |   |
|------------------------|------------------------|------|---|
| <i>Limnonectes</i>     | <i>blythii</i>         | 1.55 | 1 |
| <i>Limnonectes</i>     | <i>macrodon</i>        | 1.4  | 0 |
| <i>Limnonectes</i>     | <i>microdisca</i>      | 4.5  | 1 |
| <i>Limnonectes</i>     | <i>palavensis</i>      | 2.29 | 1 |
| <i>Limnonectes</i>     | <i>finchi</i>          | 1.96 | 1 |
| <i>Lithodytes</i>      | <i>lineatus</i>        | 2    | 0 |
| <i>Litoria</i>         | <i>caerula</i>         | 1.31 | 0 |
| <i>Litoria</i>         | <i>freycineti</i>      | 1.5  | 0 |
| <i>Litoria</i>         | <i>genimaculata</i>    | 2.35 | 0 |
| <i>Litoria</i>         | <i>inermis</i>         | 1.35 | 0 |
| <i>Litoria</i>         | <i>lesueuri</i>        | 1.44 | 0 |
| <i>Litoria</i>         | <i>nasuta</i>          | 1.15 | 0 |
| <i>Litoria</i>         | <i>pallida</i>         | 1.3  | 0 |
| <i>Litoria</i>         | <i>pearsoniana</i>     | 1.2  | 0 |
| <i>Litoria</i>         | <i>peronii</i>         | 1.5  | 0 |
| <i>Litoria</i>         | <i>phyllochroa</i>     | 1.23 | 0 |
| <i>Litoria</i>         | <i>rothii</i>          | 1.35 | 0 |
| <i>Litoria</i>         | <i>rubella</i>         | 1.05 | 0 |
| <i>Litoria</i>         | <i>spenceri</i>        | 1.6  | 0 |
| <i>Litoria</i>         | <i>subglandulosa</i>   | 1.6  | 0 |
| <i>Litoria</i>         | <i>tornieri</i>        | 1.4  | 0 |
| <i>Litoria</i>         | <i>verreauxi</i>       | 1.21 | 0 |
| <i>Litoria</i>         | <i>wotjulumensis</i>   | 1.75 | 0 |
| <i>Mantella</i>        | <i>aurantiaca</i>      | 1.75 | 0 |
| <i>Mantidactylus</i>   | <i>betsileanus</i>     | 2.5  | 0 |
| <i>Mantidactylus</i>   | <i>bicalcaratus</i>    | 1.9  | 1 |
| <i>Mantidactylus</i>   | <i>depressiceps</i>    | 3    | 0 |
| <i>Mantidactylus</i>   | <i>punctatus</i>       | 1.9  | 0 |
| <i>Mantidactylus</i>   | <i>ulcerosus</i>       | 2.5  | 1 |
| <i>Megistolotis</i>    | <i>lignarius</i>       | 1.85 | 0 |
| <i>Microhyla</i>       | <i>carolinensis</i>    | 1.2  | 0 |
| <i>Microhyla</i>       | <i>inornata</i>        | 2.1  | 0 |
| <i>Myersiella</i>      | <i>microps</i>         | 3    | 1 |
| <i>Myobatrachus</i>    | <i>gouldii</i>         | 5.06 | 0 |
| <i>Nectophryne</i>     | <i>afra</i>            | 3.5  | 1 |
| <i>Nectophrynoides</i> | <i>malcomi</i>         | 2.6  | 1 |
| <i>Nectophrynoides</i> | <i>tornieri</i>        | 3.5  | 1 |
| <i>Neobatrachus</i>    | <i>sudelli</i>         | 1.54 | 0 |
| <i>Oreophryne</i>      | <i>anulata</i>         | 3.4  | 1 |
| <i>Oreophrynella</i>   | <i>quelchii</i>        | 3    | 1 |
| <i>Osteocephalus</i>   | <i>buckleyii</i>       | 1    | 0 |
| <i>Osteocephalus</i>   | <i>oophagus</i>        | 1.74 | 1 |
| <i>Osteocephalus</i>   | <i>taurinus</i>        | 1    | 0 |
| <i>Osteopilus</i>      | <i>brunneus</i>        | 0.71 | 1 |
| <i>Osteopilus</i>      | <i>septentrionalis</i> | 3    | 0 |
| <i>Paracrinia</i>      | <i>haswelli</i>        | 1.64 | 0 |
| <i>Paratelmatobius</i> | <i>cardusoii</i>       | 1.66 | 0 |
| <i>Paratelmatobius</i> | <i>lutzii</i>          | 1.9  | 0 |
| <i>Pelobates</i>       | <i>cultripes</i>       | 2    | 0 |
| <i>Pelodytes</i>       | <i>punctatus</i>       | 1.75 | 0 |
| <i>Philoria</i>        | <i>frosti</i>          | 3.9  | 1 |
| <i>Phrynobatrachus</i> | <i>guineensis</i>      | 3    | 0 |
| <i>Phrynobatrachus</i> | <i>latifrons</i>       | 0.8  | 0 |
| <i>Phrynohyas</i>      | <i>coriacea</i>        | 2    | 0 |
| <i>Phrynohyas</i>      | <i>resinifictrix</i>   | 1.58 | 1 |
| <i>Phrynohyas</i>      | <i>zonata</i>          | 2.75 | 0 |
| <i>Phrynomantis</i>    | <i>bifasciatus</i>     | 1.3  | 0 |
| <i>Phyllobates</i>     | <i>terribilis</i>      | 2.5  | 1 |
| <i>Phyllobates</i>     | <i>vittatus</i>        | 2.5  | 1 |

|                        |                      |        |   |
|------------------------|----------------------|--------|---|
| <i>Phyllodytes</i>     | <i>luteolus</i>      | 1.1    | 1 |
| <i>Phyllomedusa</i>    | <i>medinai</i>       | 2      | 0 |
| <i>Phyllomedusa</i>    | <i>psilopygion</i>   | 4.3    | 0 |
| <i>Phyllomedusa</i>    | <i>tomopterna</i>    | 3.25   | 0 |
| <i>Phyllomedusa</i>    | <i>trinitatis</i>    | 3      | 0 |
| <i>Phyllomedusa</i>    | <i>vallianti</i>     | 2.25   | 0 |
| <i>Physalaemus</i>     | <i>cuvieri</i>       | 1.9    | 0 |
| <i>Physalaemus</i>     | <i>ephippifer</i>    | 1.5    | 0 |
| <i>Physalaemus</i>     | <i>petersi</i>       | 1      | 0 |
| <i>Pipa</i>            | <i>pipa</i>          | 6      | 1 |
| <i>Platymantis</i>     | <i>guentheri</i>     | 8.7    | 1 |
| <i>Platymantis</i>     | <i>meyeri</i>        | 7      | 1 |
| <i>Platypelis</i>      | <i>grandis</i>       | 4      | 1 |
| <i>Plectrohyla</i>     | <i>acanthodes</i>    | 2.9    | 0 |
| <i>Plectrohyla</i>     | <i>guatemalensis</i> | 2      | 0 |
| <i>Plectrohyla</i>     | <i>harwegi</i>       | 2.5    | 0 |
| <i>Plectrohyla</i>     | <i>sagorum</i>       | 1.7    | 0 |
| <i>Plethodontohyla</i> | <i>notosticta</i>    | 3.05   | 1 |
| <i>Plethodontohyla</i> | <i>tuberata</i>      | 3.75   | 1 |
| <i>Polypedates</i>     | <i>leucomystax</i>   | 1.85   | 0 |
| <i>Probreviceps</i>    | <i>rhodesianus</i>   | 5      | 1 |
| <i>Pseudacris</i>      | <i>nigrita</i>       | 0.95   | 0 |
| <i>Pseudacris</i>      | <i>ocularis</i>      | 0.7    | 0 |
| <i>Pseudacris</i>      | <i>streckeri</i>     | 1.38   | 0 |
| <i>Pseudophryne</i>    | <i>australis</i>     | 2.775  | 1 |
| <i>Pseudophryne</i>    | <i>bibroni</i>       | 2.125  | 1 |
| <i>Pseudophryne</i>    | <i>corroboree</i>    | 3.25   | 1 |
| <i>Psuedacris</i>      | <i>brachyphona</i>   | 1.55   | 0 |
| <i>Psuedacris</i>      | <i>crucifer</i>      | 1.175  | 0 |
| <i>Psuedacris</i>      | <i>ocularis</i>      | 0.95   | 0 |
| <i>Psuedacris</i>      | <i>triseriata</i>    | 1.03   | 0 |
| <i>Ptychadena</i>      | <i>bibroni</i>       | 1.675  | 0 |
| <i>Ptychadena</i>      | <i>mascariensis</i>  | 1.1    | 0 |
| <i>Ptychadena</i>      | <i>oxyrhychus</i>    | 1.3    | 0 |
| <i>Ptychadena</i>      | <i>schubotzi</i>     | 1.3    | 0 |
| <i>Ptychohyla</i>      | <i>hypomykter</i>    | 2.38   | 0 |
| <i>Pyxicephalus</i>    | <i>adpersus</i>      | 2      | 1 |
| <i>Rana</i>            | <i>aurora</i>        | 2.475  | 0 |
| <i>Rana</i>            | <i>boylei</i>        | 2.125  | 0 |
| <i>Rana</i>            | <i>cancrivora</i>    | 1.625  | 0 |
| <i>Rana</i>            | <i>cascade</i>       | 2.225  | 0 |
| <i>Rana</i>            | <i>catesbiana</i>    | 1.3    | 0 |
| <i>Rana</i>            | <i>japonica</i>      | 1.75   | 0 |
| <i>Rana</i>            | <i>nigromaculata</i> | 1.8    | 0 |
| <i>Rana</i>            | <i>porosa</i>        | 1.62   | 0 |
| <i>Rana</i>            | <i>pretiosa</i>      | 2.135  | 0 |
| <i>Rana</i>            | <i>ridibunda</i>     | 1.63   | 0 |
| <i>Rana</i>            | <i>saharica</i>      | 1.5    | 0 |
| <i>Rana</i>            | <i>slyvatica</i>     | 1.9667 | 0 |
| <i>Rana</i>            | <i>temporaria</i>    | 2.5    | 0 |
| <i>Rhacophorus</i>     | <i>arualis</i>       | 2.5    | 0 |
| <i>Rhacophorus</i>     | <i>pardalis</i>      | 3      | 0 |
| <i>Rheobatrachus</i>   | <i>silus</i>         | 4.7    | 1 |
| <i>Rhinoderma</i>      | <i>darwini</i>       | 4      | 1 |
| <i>Rhinoderma</i>      | <i>rufum</i>         | 2.5    | 1 |
| <i>Scaphiophryne</i>   | <i>calcarata</i>     | 1      | 0 |
| <i>Scaphiopus</i>      | <i>couchii</i>       | 1.45   | 0 |
| <i>Scaphiopus</i>      | <i>holbrookii</i>    | 1.7    | 0 |
| <i>Schismaderma</i>    | <i>carens</i>        | 2.05   | 0 |

|                       |                        |       |   |
|-----------------------|------------------------|-------|---|
| <i>Scinax</i>         | <i>boesmani</i>        | 1     | 0 |
| <i>Scinax</i>         | <i>boulengeri</i>      | 1.55  | 0 |
| <i>Scinax</i>         | <i>cruentomma</i>      | 1     | 0 |
| <i>Scinax</i>         | <i>dayi</i>            | 2.45  | 0 |
| <i>Scinax</i>         | <i>funerea</i>         | 1.1   | 0 |
| <i>Scinax</i>         | <i>garbei</i>          | 1.25  | 0 |
| <i>Scinax</i>         | <i>nebulosa</i>        | 1     | 0 |
| <i>Scinax</i>         | <i>rubra</i>           | 1.25  | 0 |
| <i>Semnodactylus</i>  | <i>wealii</i>          | 1.7   | 0 |
| <i>Smilisca</i>       | <i>baudinii</i>        | 1.3   | 0 |
| <i>Smilisca</i>       | <i>cyanosticta</i>     | 1.2   | 0 |
| <i>Spea</i>           | <i>bombifrons</i>      | 1.43  | 0 |
| <i>Spea</i>           | <i>hammondi</i>        | 1.305 | 0 |
| <i>Spea</i>           | <i>multiplicata</i>    | 1.34  | 0 |
| <i>Sphaenorynchus</i> | <i>carneus</i>         | 1     | 0 |
| <i>Sphaenorynchus</i> | <i>lacteus</i>         | 1     | 0 |
| <i>Stauroids</i>      | <i>chunganensis</i>    | 2.8   | 0 |
| <i>Stefania</i>       | <i>evansi</i>          | 9     | 1 |
| <i>Stephopaedes</i>   | <i>anotis</i>          | 2.5   | 0 |
| <i>Synapturanus</i>   | <i>mirandaribeiroi</i> | 2.635 | 1 |
| <i>Syncope</i>        | <i>anteneri</i>        | 1.6   | 1 |
| <i>Taudactylus</i>    | <i>eugellensis</i>     | 2.4   | 0 |
| <i>Taudactylus</i>    | <i>liemi</i>           | 2.1   | 0 |
| <i>Tomopterna</i>     | <i>cryptotis</i>       | 1.5   | 0 |
| <i>Tomopterna</i>     | <i>delelandiii</i>     | 1.5   | 0 |
| <i>Tomopterna</i>     | <i>krugerensis</i>     | 1.2   | 0 |
| <i>Tomopterna</i>     | <i>marmorata</i>       | 2     | 0 |
| <i>Uperoleia</i>      | <i>crassa</i>          | 2     | 0 |
| <i>Uperoleia</i>      | <i>rugosa</i>          | 1.25  | 0 |

Appendix 2: Species in the comparative analyses, with data on egg size and parental care. Parental care categories: PC = parental care present (1), or absent (0).
